# Supplementary material
Source: publisher figshare collection journal article supplement (https://acs.figshare.com/ndownloader/files/3609000)
Supplement: Supplementary file 1 [file 3609000]

## Supporting Information

# Fabrication of Polymer Nanopeapods in the Nanopores of Anodic Aluminum Oxide Templates Using a Double-Solution Wetting Method

Jiun-Tai Chen\*, Tzu-Hui Wei, Chun-Wei Chang, Hao-Wen Ko, Chien-Wei Chu, Mu-Huan Chi, and  
Chia-Chan Tsai

Department of Applied Chemistry, National Chiao Tung University, Hsinchu, Taiwan 30050

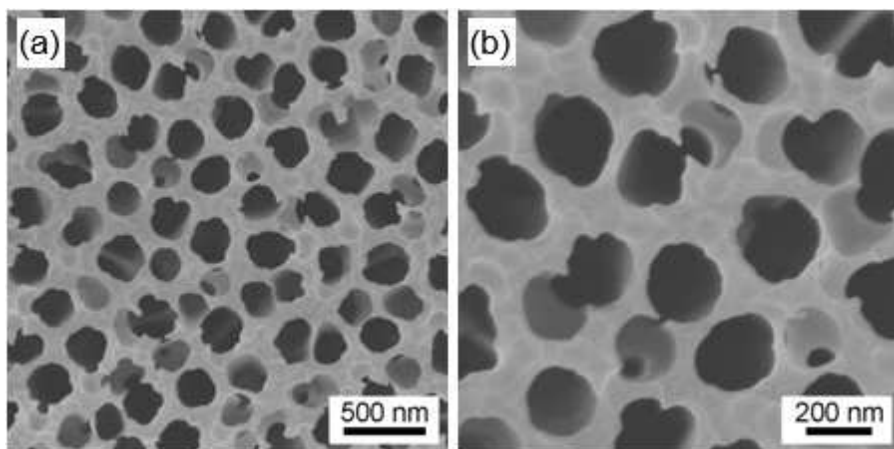

**Figure S1.** SEM images of commercial AAO templates with pore sizes ~150–400 nm: (a) lower magnification and (b) higher magnification.

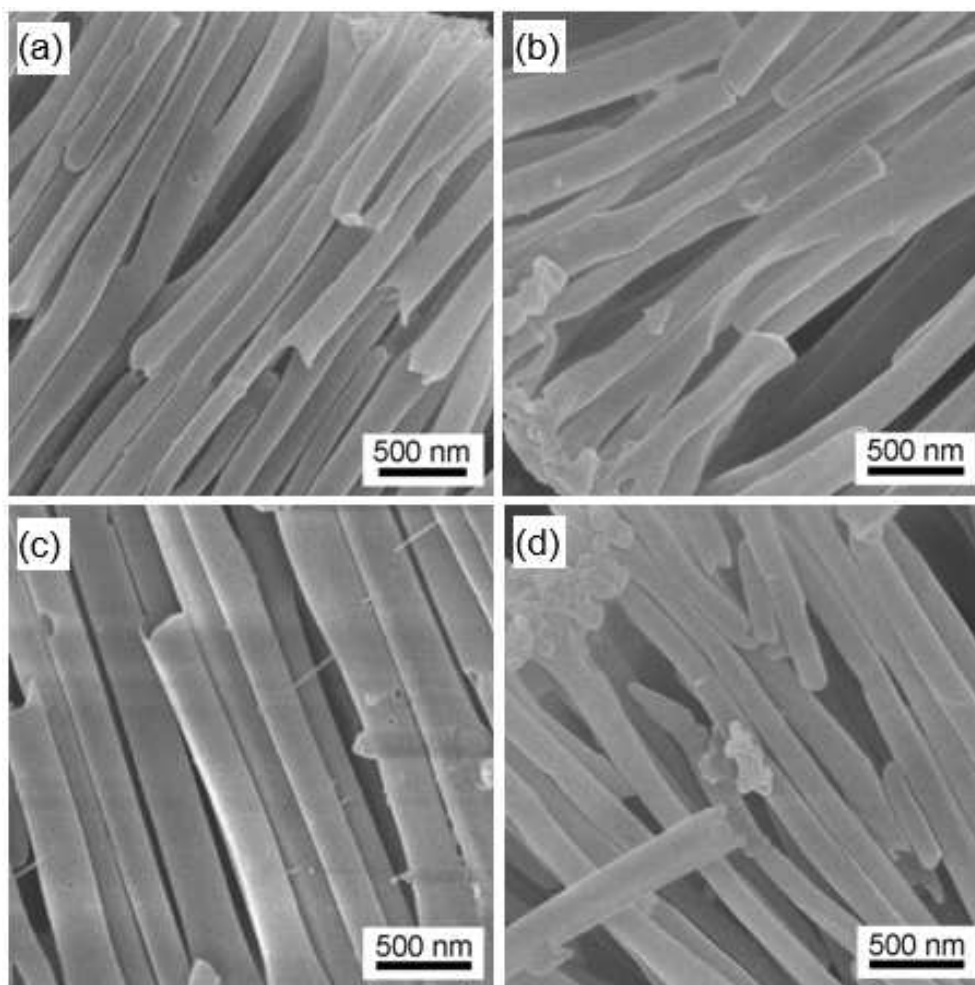

**Figure S2.** SEM images of polymer nanomaterials: (a) PMMA ( $M_w$ : 97 kg/mol) nanotubes prepared from a 5 wt % PMMA solution in acetic acid, (b) PMMA nanotubes after the PMMA sample is immersed in cyclohexane for 24 h, (c) PS ( $M_w$ : 35 kg/mol) nanotubes prepared from a 5 wt % PS solution in DMF, and (d) PS nanotubes after the PS sample is immersed in acetic acid for 24 h.

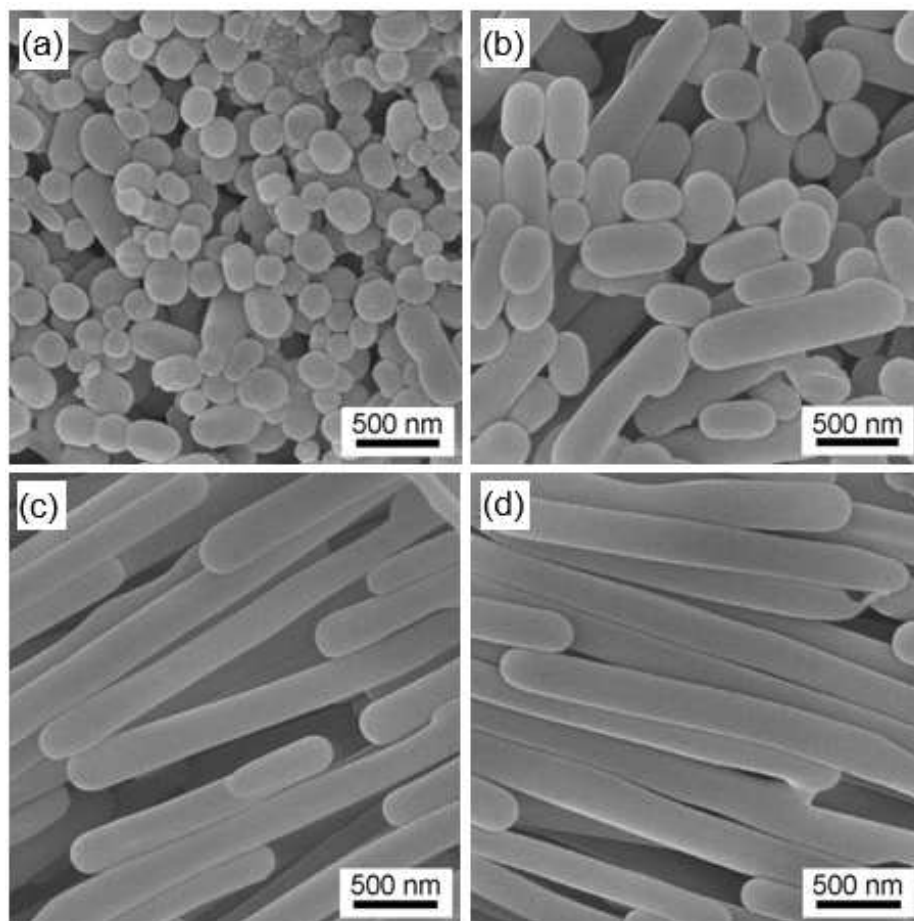

**Figure S3.** SEM images of PS ( $M_w$ : 78.5 kg/mol) nanospheres and nanorods. The samples are first prepared by dipping AAO templates in PS solutions in DMF with different concentrations, followed by immersing the samples in 10 wt % PMMA solutions in acetic acid. After the samples are dried, PMMA is removed selectively by acetic acid. The AAO templates are then dissolved by  $\text{NaOH}_{(\text{aq})}$  to release the polymer nanostructures. The concentrations of the PS solutions are (a) 5, (b) 10, (c) 20, and (d) 30 wt %.

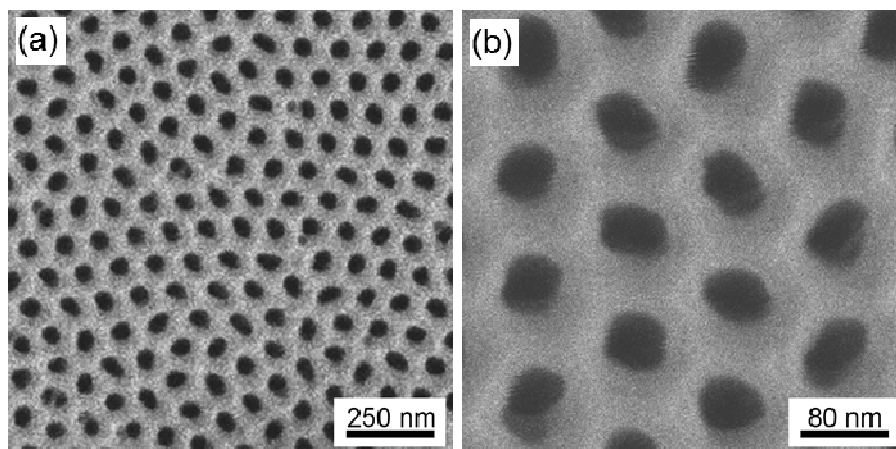

**Figure S4.** SEM images of synthesized AAO templates with pore sizes  $\sim 50$  nm: (a) lower magnification and (b) higher magnification.

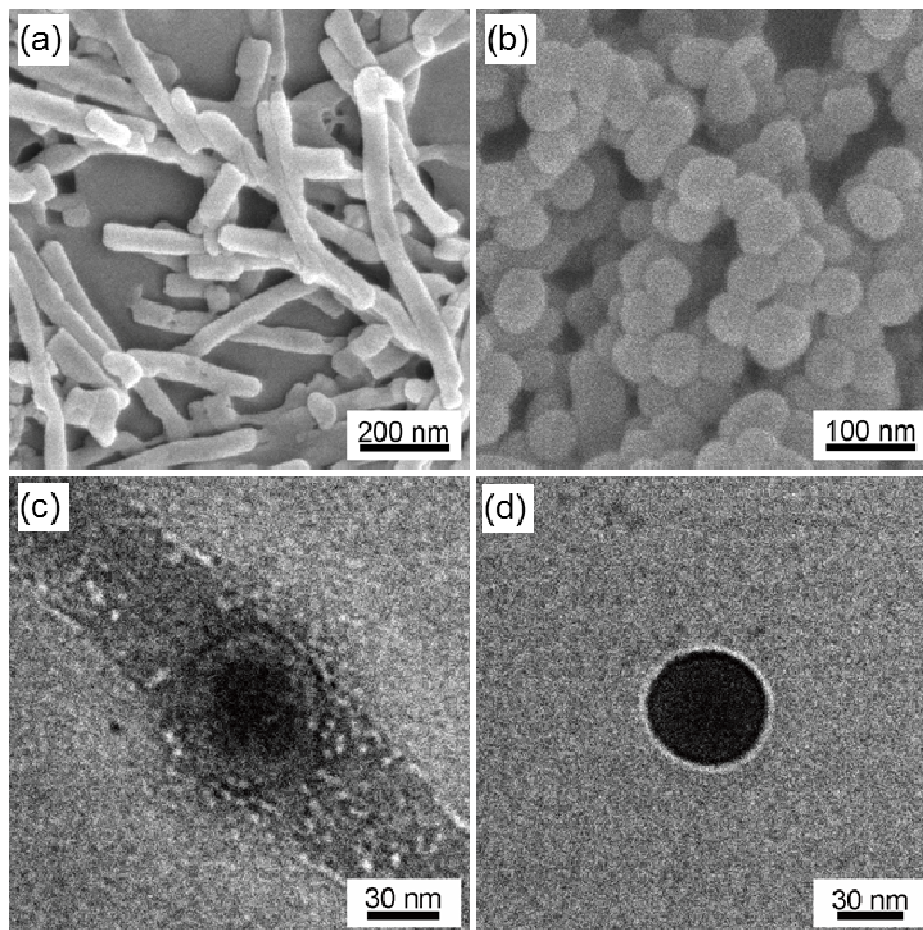

**Figure S5.** (a) SEM image of peapod-like PS ( $M_w$ : 35 kg/mol) /PMMA ( $M_w$ : 97 kg/mol) nanostructures. (b) SEM image of the PS nanospheres after the PMMA is removed selectively by acetic acid. (c) TEM image of a peapod-like PS/PMMA nanostructure. (d) TEM image of a PS nanosphere after the PMMA is removed selectively by acetic acid. The samples are obtained using synthesized AAO templates with pore diameters  $\sim 50$  nm.
